# Supplementary material
Source: PubMed Central journal article supplement (PMC10699410)
Supplement: ehp12834.s001.acco.pdf [file ehp12834.s001.acco.pdf]

**Note to readers with disabilities:** *EHP* strives to ensure that all journal content is accessible to all readers. However, some figures and Supplemental Material published in *EHP* articles may not conform to [508 standards](#) due to the complexity of the information being presented. If you need assistance accessing journal content, please contact [ehp508@niehs.nih.gov](mailto:ehp508@niehs.nih.gov). Our staff will work with you to assess and meet your accessibility needs within 3 working days.

### **Supplemental Material**

#### **Glyphosate Use and Mosaic Loss of Chromosome Y among Male Farmers in the Agricultural Health Study**

Vicky C. Chang, Weiyin Zhou, Sonja I. Berndt, Gabriella Andreotti, Meredith Yeager, Christine G. Parks, Dale P. Sandler, Nathaniel Rothman, Laura E. Beane Freeman, Mitchell J. Machiela, and Jonathan N. Hofmann

#### **Table of Contents**

**Table S1.** Age-specific prevalence of mosaic loss of chromosome Y among male farmers in the BEEA study, overall and by cellular fraction.

**Table S2.** Multivariable adjusted associations between participant characteristics and overall or expanded mLOY among male farmers in the BEEA study.

**Table S3.** Associations between lifetime occupational glyphosate use and overall or expanded mLOY in minimally adjusted models among male farmers in the BEEA study.

**Table S4.** Associations between lifetime occupational glyphosate use and mLOY according to cellular fraction (vs. no mLOY) among male farmers in the BEEA study.

**Table S5.** Associations between intensity-weighted lifetime days of occupational glyphosate use and expanded mLOY (cellular fraction  $\geq 10\%$ ) among male farmers in the BEEA study, stratified by age group, smoking status, BMI, or state of residence.

**Table S6.** Associations between lifetime occupational glyphosate use and overall or expanded mLOY among male farmers of European ancestry in the BEEA study.

**Table S7.** Associations between lifetime occupational glyphosate use and overall or expanded mLOY among male farmers whose DNA was extracted from whole blood samples in the BEEA study.

**Table S8.** Associations between lifetime occupational glyphosate use and overall or expanded mLOY in models additionally adjusted for year of blood sample collection among male farmers in the BEEA study.

**Table S9.** Associations between lifetime occupational glyphosate use and overall or expanded mLOY in models additionally adjusted for alcohol consumption at AHS enrollment among male farmers in the BEEA study.

**Table S1.** Age-specific prevalence of mosaic loss of chromosome Y among male farmers in the BEEA study, overall and by cellular fraction.

| Age group (y) | $N_{\text{total}}$ | All mLOY |                | mLOY, CF <10% |                | mLOY, CF $\geq$ 10% |                |
|---------------|--------------------|----------|----------------|---------------|----------------|---------------------|----------------|
|               |                    | $n$      | Prevalence (%) | $n$           | Prevalence (%) | $n$                 | Prevalence (%) |
| 50–54         | 235                | 7        | 3.0            | 6             | 2.6            | 1                   | 0.4            |
| 55–59         | 286                | 17       | 5.9            | 12            | 4.2            | 5                   | 1.7            |
| 60–64         | 299                | 49       | 16.4           | 35            | 11.7           | 14                  | 4.7            |
| 65–69         | 269                | 64       | 23.8           | 37            | 13.8           | 27                  | 10.0           |
| 70–74         | 228                | 79       | 34.6           | 44            | 19.3           | 35                  | 15.4           |
| 75–79         | 182                | 69       | 37.9           | 32            | 17.6           | 37                  | 20.3           |
| 80–84         | 73                 | 39       | 53.4           | 15            | 20.5           | 24                  | 32.9           |
| $\geq$ 85     | 34                 | 19       | 55.9           | 4             | 11.8           | 15                  | 44.1           |
| Total         | 1,606              | 343      | 21.4           | 185           | 11.5           | 158                 | 9.8            |

Note: BEEA, Biomarkers of Exposure and Effect in Agriculture; CF, cellular fraction; mLOY, mosaic loss of chromosome Y. This table provides numerical data corresponding to Figure 1.

**Table S2.** Multivariable adjusted associations between participant characteristics and overall or expanded mLOY among male farmers in the BEEA study.

| Characteristic                        | <i>N</i> <sub>total</sub> | Overall mLOY           |                         |                          | Expanded mLOY          |                         |                          |
|---------------------------------------|---------------------------|------------------------|-------------------------|--------------------------|------------------------|-------------------------|--------------------------|
|                                       |                           | <i>n</i> <sub>no</sub> | <i>n</i> <sub>yes</sub> | OR (95% CI) <sup>a</sup> | <i>n</i> <sub>no</sub> | <i>n</i> <sub>yes</sub> | OR (95% CI) <sup>b</sup> |
| Age, per 1-year increase <sup>c</sup> | 1,606                     | 1,263                  | 343                     | 1.12 (1.10, 1.14)        | 1,448                  | 158                     | 1.13 (1.10, 1.16)        |
| State                                 |                           |                        |                         |                          |                        |                         |                          |
| Iowa                                  | 1,237                     | 984                    | 253                     | 1.00 (Ref)               | 1,125                  | 112                     | 1.00 (Ref)               |
| North Carolina                        | 369                       | 279                    | 90                      | 0.93 (0.67, 1.29)        | 323                    | 46                      | 1.03 (0.67, 1.58)        |
| Source of DNA                         |                           |                        |                         |                          |                        |                         |                          |
| Whole blood                           | 1,500                     | 1,178                  | 322                     | 1.00 (Ref)               | 1,352                  | 148                     | 1.00 (Ref)               |
| Buffy coat                            | 106                       | 85                     | 21                      | 1.52 (0.86, 2.66)        | 96                     | 10                      | 1.78 (0.83, 3.82)        |
| Smoking status <sup>d</sup>           |                           |                        |                         |                          |                        |                         |                          |
| Never                                 | 950                       | 770                    | 180                     | 1.00 (Ref)               | 868                    | 82                      | 1.00 (Ref)               |
| Former                                | 583                       | 443                    | 140                     | 0.90 (0.67, 1.19)        | 519                    | 64                      | 0.82 (0.55, 1.20)        |
| Current                               | 73                        | 50                     | 23                      | 3.22 (1.74, 5.96)        | 61                     | 12                      | 3.13 (1.42, 6.87)        |
| Smoking status and pack-years         |                           |                        |                         |                          |                        |                         |                          |
| Never                                 | 950                       | 770                    | 180                     | 1.00 (Ref)               | 868                    | 82                      | 1.00 (Ref)               |
| Former, tertile 1 ( $\leq 3.75$ )     | 187                       | 155                    | 32                      | 0.63 (0.40, 0.98)        | 172                    | 15                      | 0.65 (0.35, 1.20)        |
| Former, tertile 2 ( $> 3.75$ –23.0)   | 188                       | 147                    | 41                      | 0.75 (0.49, 1.14)        | 167                    | 21                      | 0.82 (0.47, 1.41)        |
| Former, tertile 3 ( $> 23.0$ )        | 186                       | 126                    | 60                      | 1.39 (0.93, 2.06)        | 161                    | 25                      | 0.96 (0.56, 1.65)        |
| Current, tertile 1 ( $\leq 28.5$ )    | 24                        | 17                     | 7                       | 3.46 (1.18, 10.11)       | 20                     | 4                       | 4.05 (1.03, 15.96)       |
| Current, tertile 2 ( $> 28.5$ –53.25) | 23                        | 16                     | 7                       | 4.51 (1.63, 12.49)       | 19                     | 4                       | 6.71 (1.84, 24.43)       |
| Current, tertile 3 ( $> 53.25$ )      | 23                        | 16                     | 7                       | 2.11 (0.77, 5.83)        | 20                     | 3                       | 1.46 (0.37, 5.76)        |
| Missing                               | 25                        | 16                     | 9                       | 1.45 (0.57, 3.68)        | 21                     | 4                       | 0.87 (0.27, 2.82)        |
| Alcohol consumption (servings/wk)     |                           |                        |                         |                          |                        |                         |                          |
| 0                                     | 798                       | 609                    | 189                     | 1.00 (Ref)               | 702                    | 96                      | 1.00 (Ref)               |
| 1–2                                   | 292                       | 228                    | 64                      | 1.04 (0.72, 1.48)        | 266                    | 26                      | 0.86 (0.52, 1.43)        |
| 3–6                                   | 247                       | 200                    | 47                      | 1.09 (0.73, 1.63)        | 228                    | 19                      | 1.00 (0.56, 1.76)        |
| $\geq 7$                              | 269                       | 226                    | 43                      | 0.93 (0.61, 1.42)        | 252                    | 17                      | 0.85 (0.46, 1.56)        |
| BMI (kg/m <sup>2</sup> )              |                           |                        |                         |                          |                        |                         |                          |
| $< 25$                                | 252                       | 178                    | 74                      | 1.00 (Ref)               | 210                    | 42                      | 1.00 (Ref)               |
| 25 to $< 30$                          | 716                       | 567                    | 149                     | 0.88 (0.61, 1.27)        | 657                    | 59                      | 0.64 (0.40, 1.02)        |
| 30 to $< 35$                          | 441                       | 353                    | 88                      | 0.96 (0.63, 1.45)        | 394                    | 47                      | 1.03 (0.61, 1.74)        |
| $\geq 35$                             | 197                       | 165                    | 32                      | 0.88 (0.52, 1.49)        | 187                    | 10                      | 0.52 (0.24, 1.14)        |
| History of diabetes                   |                           |                        |                         |                          |                        |                         |                          |
| No                                    | 1,369                     | 1,088                  | 281                     | 1.00 (Ref)               | 1,247                  | 122                     | 1.00 (Ref)               |
| Yes                                   | 237                       | 175                    | 62                      | 1.09 (0.76, 1.56)        | 201                    | 36                      | 1.50 (0.95, 2.35)        |
| History of hypertension/heart disease |                           |                        |                         |                          |                        |                         |                          |
| No                                    | 763                       | 621                    | 142                     | 1.00 (Ref)               | 707                    | 56                      | 1.00 (Ref)               |
| Yes                                   | 843                       | 642                    | 201                     | 0.74 (0.56, 0.99)        | 741                    | 102                     | 0.94 (0.63, 1.39)        |

Note: BEEA, Biomarkers of Exposure and Effect in Agriculture; BMI, body mass index; CI, confidence interval; mLOY, mosaic loss of chromosome Y; OR, odds ratio; Ref, reference.

<sup>a</sup>Estimated from logistic regression modeling the odds of any detectable mLOY (yes vs. no), adjusted for age (years; continuous), age<sup>2</sup>, and simultaneously for all other variables presented (when adjusting for smoking, the combined smoking status and pack-years variable was used).  $p < 0.001$  for both age and age<sup>2</sup>.

<sup>b</sup>Estimated from logistic regression modeling the odds of expanded mLOY [yes (cellular fraction  $\geq 10\%$ ) vs. no (cellular fraction  $< 10\%$  or no mLOY)], adjusted for age (years; continuous), age<sup>2</sup>, and simultaneously for all other variables presented (when adjusting for smoking, the combined smoking status and pack-years variable was used).  $p = 0.001$  and  $0.01$  for age and age<sup>2</sup>, respectively.

<sup>c</sup>Not adjusted for age<sup>2</sup>.

<sup>d</sup>Not adjusted for pack-years of smoking.

**Table S3.** Associations between lifetime occupational glyphosate use and overall or expanded mLOY in minimally adjusted models among male farmers in the BEEA study.

| Glyphosate use                   | <i>N</i> <sub>total</sub> | Overall mLOY <sup>a</sup> |                         |                                               | Expanded mLOY <sup>b</sup> |                         |                                               |
|----------------------------------|---------------------------|---------------------------|-------------------------|-----------------------------------------------|----------------------------|-------------------------|-----------------------------------------------|
|                                  |                           | <i>n</i> <sub>no</sub>    | <i>n</i> <sub>yes</sub> | OR (95% CI) <sup>c</sup>                      | <i>n</i> <sub>no</sub>     | <i>n</i> <sub>yes</sub> | OR (95% CI) <sup>c</sup>                      |
| Total lifetime days              |                           |                           |                         |                                               |                            |                         |                                               |
| Quartile 1 (0–26)                | 402                       | 300                       | 102                     | 1.00 (Ref)                                    | 351                        | 51                      | 1.00 (Ref)                                    |
| Quartile 2 (>26–76)              | 402                       | 306                       | 96                      | 1.15 (0.81, 1.63)                             | 363                        | 39                      | 0.93 (0.58, 1.51)                             |
| Quartile 3 (>76–161)             | 403                       | 327                       | 76                      | 1.14 (0.79, 1.66)                             | 371                        | 32                      | 1.13 (0.68, 1.88)                             |
| Quartile 4 (>161–3,063)          | 399                       | 330                       | 69                      | 1.10 (0.75, 1.62)                             | 363                        | 36                      | 1.43 (0.86, 2.37)                             |
|                                  |                           |                           |                         | <i>p</i> <sub>trend</sub> <sup>d</sup> = 0.78 |                            |                         | <i>p</i> <sub>trend</sub> <sup>d</sup> = 0.11 |
| Intensity-weighted lifetime days |                           |                           |                         |                                               |                            |                         |                                               |
| Quartile 1 (0–1,341)             | 401                       | 303                       | 98                      | 1.00 (Ref)                                    | 352                        | 49                      | 1.00 (Ref)                                    |
| Quartile 2 (>1,341–3,885)        | 400                       | 301                       | 99                      | 1.37 (0.96, 1.95)                             | 358                        | 42                      | 1.19 (0.74, 1.91)                             |
| Quartile 3 (>3,885–9,341)        | 401                       | 327                       | 74                      | 1.09 (0.75, 1.59)                             | 372                        | 29                      | 0.92 (0.55, 1.56)                             |
| Quartile 4 (>9,341–244,237)      | 400                       | 328                       | 72                      | 1.16 (0.79, 1.70)                             | 362                        | 38                      | 1.50 (0.91, 2.48)                             |
|                                  |                           |                           |                         | <i>p</i> <sub>trend</sub> <sup>d</sup> = 0.85 |                            |                         | <i>p</i> <sub>trend</sub> <sup>d</sup> = 0.14 |

Note: BEEA, Biomarkers of Exposure and Effect in Agriculture; BMI, body mass index; CI, confidence interval; mLOY, mosaic loss of chromosome Y; OR, odds ratio; Ref, reference.

<sup>a</sup>Any detectable mLOY (yes vs. no).

<sup>b</sup>mLOY affecting ≥10% of cells [yes vs. no (cellular fraction <10% or no mLOY)].

<sup>c</sup>Calculated using a logistic regression model adjusted for age (years; continuous), age<sup>2</sup>, state of residence (Iowa, North Carolina), source of DNA (whole blood, buffy coat), smoking status and pack-years (never, former/tertile 1, former/tertile 2, former/tertile 3, current/tertile 1, current/tertile 2, current/tertile 3, missing), and BMI (<25, 25 to <30, 30 to <35, ≥35 kg/m<sup>2</sup>).

<sup>d</sup>Calculated by modeling quartile-specific median values of total lifetime days or intensity-weighted lifetime days of glyphosate use as a continuous variable.

**Table S4.** Associations between lifetime occupational glyphosate use and mLOY according to cellular fraction (vs. no mLOY) among male farmers in the BEEA study.

| Glyphosate use                   | <i>n</i> <sub>no mLOY</sub> | mLOY, CF <10% |                                               | mLOY, CF ≥10% |                                               |
|----------------------------------|-----------------------------|---------------|-----------------------------------------------|---------------|-----------------------------------------------|
|                                  |                             | <i>n</i>      | OR (95% CI) <sup>a</sup>                      | <i>n</i>      | OR (95% CI) <sup>a</sup>                      |
| Total lifetime days              |                             |               |                                               |               |                                               |
| Quartile 1 (0–26)                | 300                         | 51            | 1.00 (Ref)                                    | 51            | 1.00 (Ref)                                    |
| Quartile 2 (>26–76)              | 306                         | 47            | 1.30 (0.84, 2.02)                             | 39            | 1.13 (0.68, 1.88)                             |
| Quartile 3 (>76–161)             | 327                         | 44            | 1.20 (0.75, 1.94)                             | 32            | 1.29 (0.75, 2.21)                             |
| Quartile 4 (>161–3,063)          | 330                         | 33            | 0.96 (0.56, 1.66)                             | 36            | 1.72 (0.96, 3.07)                             |
|                                  |                             |               | <i>p</i> <sub>trend</sub> <sup>b</sup> = 0.59 |               | <i>p</i> <sub>trend</sub> <sup>b</sup> = 0.06 |
| Intensity-weighted lifetime days |                             |               |                                               |               |                                               |
| Quartile 1 (0–1,341)             | 303                         | 49            | 1.00 (Ref)                                    | 49            | 1.00 (Ref)                                    |
| Quartile 2 (>1,341–3,885)        | 301                         | 57            | 1.48 (0.94, 2.33)                             | 42            | 1.47 (0.88, 2.47)                             |
| Quartile 3 (>3,885–9,341)        | 327                         | 45            | 1.28 (0.79, 2.08)                             | 29            | 1.19 (0.68, 2.09)                             |
| Quartile 4 (>9,341–244,237)      | 328                         | 34            | 1.05 (0.61, 1.81)                             | 38            | 1.76 (0.99, 3.15)                             |
|                                  |                             |               | <i>p</i> <sub>trend</sub> <sup>b</sup> = 0.65 |               | <i>p</i> <sub>trend</sub> <sup>b</sup> = 0.11 |

Note: BEEA, Biomarkers of Exposure and Effect in Agriculture; BMI, body mass index; CF, cellular fraction; CI, confidence interval; mLOY, mosaic loss of chromosome Y; OR, odds ratio; Ref, reference.

<sup>a</sup>Calculated using a logistic regression model adjusted for age (years; continuous), age<sup>2</sup>, state of residence (Iowa, North Carolina), source of DNA (whole blood, buffy coat), smoking status and pack-years (never, former/tertile 1, former/tertile 2, former/tertile 3, current/tertile 1, current/tertile 2, current/tertile 3, missing), alcohol consumption (0, 1–2, 3–6, ≥7 servings in the past 7 d), BMI (<25, 25 to <30, 30 to <35, ≥35 kg/m<sup>2</sup>), history of diabetes (no, yes), history of hypertension/heart disease (no, yes), and lifetime occupational use of 2,4-dichlorophenoxyacetic acid (quartiles of total lifetime days or intensity-weighted lifetime days, missing as a separate category).

<sup>b</sup>Calculated by modeling quartile-specific median values of total lifetime days or intensity-weighted lifetime days of glyphosate use as a continuous variable.

**Table S5.** Associations between intensity-weighted lifetime days of occupational glyphosate use and expanded mLOY (cellular fraction  $\geq 10\%$ ) among male farmers in the BEEA study, stratified by age group, smoking status, BMI, or state of residence.

| Subgroup                            | Intensity-weighted lifetime days of glyphosate use |                   |                   |                   | $p_{\text{trend}}^a$ | $p_{\text{interaction}}^b$ |
|-------------------------------------|----------------------------------------------------|-------------------|-------------------|-------------------|----------------------|----------------------------|
|                                     | Quartile 1                                         | Quartile 2        | Quartile 3        | Quartile 4        |                      |                            |
| Age group                           |                                                    |                   |                   |                   |                      |                            |
| <70 y                               |                                                    |                   |                   |                   |                      |                            |
| No. of cases/total                  | 11/223                                             | 14/266            | 8/292             | 14/305            |                      |                            |
| OR (95% CI) <sup>c</sup>            | 1.00 (Ref)                                         | 1.45 (0.59, 3.55) | 0.87 (0.32, 2.36) | 1.53 (0.59, 3.98) | 0.50                 | 0.64                       |
| $\geq 70$ y                         |                                                    |                   |                   |                   |                      |                            |
| No. of cases/total                  | 38/178                                             | 28/134            | 21/109            | 24/95             |                      |                            |
| OR (95% CI) <sup>c</sup>            | 1.00 (Ref)                                         | 1.29 (0.70, 2.37) | 1.25 (0.64, 2.45) | 2.04 (1.00, 4.15) | 0.06                 |                            |
| Smoking status                      |                                                    |                   |                   |                   |                      |                            |
| Never smokers                       |                                                    |                   |                   |                   |                      |                            |
| No. of cases/total                  | 22/232                                             | 20/243            | 20/240            | 20/232            |                      |                            |
| OR (95% CI) <sup>c</sup>            | 1.00 (Ref)                                         | 1.22 (0.59, 2.54) | 1.75 (0.83, 3.72) | 2.18 (0.98, 4.83) | 0.049                | 0.23                       |
| Ever smokers                        |                                                    |                   |                   |                   |                      |                            |
| No. of cases/total                  | 27/169                                             | 22/157            | 9/161             | 18/168            |                      |                            |
| OR (95% CI) <sup>c</sup>            | 1.00 (Ref)                                         | 1.28 (0.64, 2.57) | 0.49 (0.21, 1.18) | 1.42 (0.62, 3.25) | 0.60                 |                            |
| BMI                                 |                                                    |                   |                   |                   |                      |                            |
| <30 kg/m <sup>2</sup> (non-obese)   |                                                    |                   |                   |                   |                      |                            |
| No. of cases/total                  | 29/252                                             | 28/247            | 18/222            | 26/245            |                      |                            |
| OR (95% CI) <sup>c</sup>            | 1.00 (Ref)                                         | 1.44 (0.76, 2.71) | 1.24 (0.60, 2.56) | 2.12 (1.02, 4.38) | 0.06                 | 0.18                       |
| $\geq 30$ kg/m <sup>2</sup> (obese) |                                                    |                   |                   |                   |                      |                            |
| No. of cases/total                  | 20/149                                             | 14/153            | 11/179            | 12/155            |                      |                            |
| OR (95% CI) <sup>c</sup>            | 1.00 (Ref)                                         | 1.06 (0.46, 2.42) | 0.76 (0.32, 1.82) | 1.13 (0.45, 2.85) | 0.85                 |                            |
| State of residence                  |                                                    |                   |                   |                   |                      |                            |
| Iowa                                |                                                    |                   |                   |                   |                      |                            |
| No. of cases/total                  | 39/320                                             | 30/316            | 19/313            | 24/284            |                      |                            |
| OR (95% CI) <sup>c</sup>            | 1.00 (Ref)                                         | 1.24 (0.70, 2.23) | 1.00 (0.52, 1.92) | 1.75 (0.89, 3.44) | 0.14                 | 0.99                       |
| North Carolina                      |                                                    |                   |                   |                   |                      |                            |
| No. of cases/total                  | 10/81                                              | 12/84             | 10/88             | 14/116            |                      |                            |
| OR (95% CI) <sup>c</sup>            | 1.00 (Ref)                                         | 1.10 (0.38, 3.23) | 1.30 (0.41, 4.11) | 1.82 (0.58, 5.71) | 0.25                 |                            |

Note: BEEA, Biomarkers of Exposure and Effect in Agriculture; BMI, body mass index; CI, confidence interval; mLOY, mosaic loss of chromosome Y; OR, odds ratio; Ref, reference.

<sup>a</sup>Calculated by modeling quartile-specific median values of intensity-weighted lifetime days of glyphosate use as a continuous variable.

<sup>b</sup>Calculated using likelihood-ratio test comparing models with and without a multiplicative interaction term between intensity-weighted lifetime days of glyphosate use (quartile-specific medians) and age group, smoking status, BMI, or state of residence.

<sup>c</sup>Calculated using a logistic regression model adjusted for age (years; continuous), age<sup>2</sup>, state of residence (Iowa, North Carolina), source of DNA (whole blood, buffy coat), smoking status and pack-years (never, former/tertile 1, former/tertile 2, former/tertile 3, current/tertile 1, current/tertile 2, current/tertile 3, missing), alcohol consumption (0, 1–2, 3–6,  $\geq 7$  servings in the past 7 d), BMI (<25, 25 to <30, 30 to <35,  $\geq 35$  kg/m<sup>2</sup>), history of diabetes (no, yes), history of hypertension/heart disease (no, yes), and lifetime occupational use of 2,4-dichlorophenoxyacetic acid (quartiles of intensity-weighted lifetime days, missing as a separate category).

**Table S6.** Associations between lifetime occupational glyphosate use and overall or expanded mLOY among male farmers of European ancestry in the BEEA study.

| Glyphosate use                   | $N_{\text{total}}$ | Overall mLOY <sup>a</sup> |                  |                             | Expanded mLOY <sup>b</sup> |                  |                             |
|----------------------------------|--------------------|---------------------------|------------------|-----------------------------|----------------------------|------------------|-----------------------------|
|                                  |                    | $n_{\text{no}}$           | $n_{\text{yes}}$ | OR (95% CI) <sup>c</sup>    | $n_{\text{no}}$            | $n_{\text{yes}}$ | OR (95% CI) <sup>c</sup>    |
| Total lifetime days              |                    |                           |                  |                             |                            |                  |                             |
| Quartile 1 (0–26)                | 396                | 294                       | 102              | 1.00 (Ref)                  | 345                        | 51               | 1.00 (Ref)                  |
| Quartile 2 (>26–76)              | 399                | 303                       | 96               | 1.21 (0.85, 1.73)           | 360                        | 39               | 1.02 (0.63, 1.66)           |
| Quartile 3 (>76–161)             | 401                | 327                       | 74               | 1.16 (0.79, 1.71)           | 369                        | 32               | 1.22 (0.72, 2.07)           |
| Quartile 4 (>161–3,063)          | 397                | 328                       | 69               | 1.21 (0.79, 1.86)           | 361                        | 36               | 1.72 (0.98, 3.02)           |
|                                  |                    |                           |                  | $p_{\text{trend}}^d = 0.53$ |                            |                  | $p_{\text{trend}}^d = 0.04$ |
| Intensity-weighted lifetime days |                    |                           |                  |                             |                            |                  |                             |
| Quartile 1 (0–1,341)             | 395                | 297                       | 98               | 1.00 (Ref)                  | 346                        | 49               | 1.00 (Ref)                  |
| Quartile 2 (>1,341–3,885)        | 399                | 300                       | 99               | 1.44 (1.00, 2.08)           | 357                        | 42               | 1.30 (0.80, 2.13)           |
| Quartile 3 (>3,885–9,341)        | 398                | 325                       | 73               | 1.15 (0.77, 1.71)           | 369                        | 29               | 1.02 (0.59, 1.76)           |
| Quartile 4 (>9,341–244,237)      | 397                | 326                       | 71               | 1.26 (0.82, 1.93)           | 359                        | 38               | 1.75 (1.00, 3.06)           |
|                                  |                    |                           |                  | $p_{\text{trend}}^d = 0.68$ |                            |                  | $p_{\text{trend}}^d = 0.08$ |

Note: BEEA, Biomarkers of Exposure and Effect in Agriculture; BMI, body mass index; CI, confidence interval; mLOY, mosaic loss of chromosome Y; OR, odds ratio; Ref, reference.

<sup>a</sup>Any detectable mLOY (yes vs. no).

<sup>b</sup>mLOY affecting  $\geq 10\%$  of cells [yes vs. no (cellular fraction  $< 10\%$  or no mLOY)].

<sup>c</sup>Calculated using a logistic regression model adjusted for age (years; continuous), age<sup>2</sup>, state of residence (Iowa, North Carolina), source of DNA (whole blood, buffy coat), smoking status and pack-years (never, former/tertile 1, former/tertile 2, former/tertile 3, current/tertile 1, current/tertile 2, current/tertile 3, missing), alcohol consumption (0, 1–2, 3–6,  $\geq 7$  servings in the past 7 d), BMI ( $< 25$ , 25 to  $< 30$ , 30 to  $< 35$ ,  $\geq 35$  kg/m<sup>2</sup>), history of diabetes (no, yes), history of hypertension/heart disease (no, yes), and lifetime occupational use of 2,4-dichlorophenoxyacetic acid (quartiles of total lifetime days or intensity-weighted lifetime days, missing as a separate category).

<sup>d</sup>Calculated by modeling quartile-specific median values of total lifetime days or intensity-weighted lifetime days of glyphosate use as a continuous variable.



**Table S7.** Associations between lifetime occupational glyphosate use and overall or expanded mLOY among male farmers whose DNA was extracted from whole blood samples in the BEEA study.

| Glyphosate use                   | <i>N</i> <sub>total</sub> | Overall mLOY <sup>a</sup> |                         |                                               | Expanded mLOY <sup>b</sup> |                         |                                               |
|----------------------------------|---------------------------|---------------------------|-------------------------|-----------------------------------------------|----------------------------|-------------------------|-----------------------------------------------|
|                                  |                           | <i>n</i> <sub>no</sub>    | <i>n</i> <sub>yes</sub> | OR (95% CI) <sup>c</sup>                      | <i>n</i> <sub>no</sub>     | <i>n</i> <sub>yes</sub> | OR (95% CI) <sup>c</sup>                      |
| Total lifetime days              |                           |                           |                         |                                               |                            |                         |                                               |
| Quartile 1 (0–26)                | 375                       | 280                       | 95                      | 1.00 (Ref)                                    | 328                        | 47                      | 1.00 (Ref)                                    |
| Quartile 2 (>26–76)              | 378                       | 288                       | 90                      | 1.24 (0.86, 1.80)                             | 341                        | 37                      | 1.05 (0.63, 1.74)                             |
| Quartile 3 (>76–161)             | 376                       | 304                       | 72                      | 1.25 (0.84, 1.87)                             | 346                        | 30                      | 1.23 (0.71, 2.12)                             |
| Quartile 4 (>161–3,063)          | 371                       | 306                       | 65                      | 1.30 (0.84, 2.01)                             | 337                        | 34                      | 1.82 (1.02, 3.26)                             |
|                                  |                           |                           |                         | <i>p</i> <sub>trend</sub> <sup>d</sup> = 0.36 |                            |                         | <i>p</i> <sub>trend</sub> <sup>d</sup> = 0.03 |
| Intensity-weighted lifetime days |                           |                           |                         |                                               |                            |                         |                                               |
| Quartile 1 (0–1,341)             | 375                       | 282                       | 93                      | 1.00 (Ref)                                    | 330                        | 45                      | 1.00 (Ref)                                    |
| Quartile 2 (>1,341–3,885)        | 380                       | 287                       | 93                      | 1.45 (0.99, 2.11)                             | 339                        | 41                      | 1.42 (0.86, 2.36)                             |
| Quartile 3 (>3,885–9,341)        | 377                       | 307                       | 70                      | 1.21 (0.81, 1.81)                             | 351                        | 26                      | 1.01 (0.57, 1.79)                             |
| Quartile 4 (>9,341–244,237)      | 365                       | 299                       | 66                      | 1.29 (0.83, 2.00)                             | 329                        | 36                      | 1.88 (1.05, 3.35)                             |
|                                  |                           |                           |                         | <i>p</i> <sub>trend</sub> <sup>d</sup> = 0.61 |                            |                         | <i>p</i> <sub>trend</sub> <sup>d</sup> = 0.06 |

Note: BEEA, Biomarkers of Exposure and Effect in Agriculture; BMI, body mass index; CI, confidence interval; mLOY, mosaic loss of chromosome Y; OR, odds ratio; Ref, reference.

<sup>a</sup>Any detectable mLOY (yes vs. no).

<sup>b</sup>mLOY affecting ≥10% of cells [yes vs. no (cellular fraction <10% or no mLOY)].

<sup>c</sup>Calculated using a logistic regression model adjusted for age (years; continuous), age<sup>2</sup>, state of residence (Iowa, North Carolina), smoking status and pack-years (never, former/tertile 1, former/tertile 2, former/tertile 3, current/tertile 1, current/tertile 2, current/tertile 3, missing), alcohol consumption (0, 1–2, 3–6, ≥7 servings in the past 7 d), BMI (<25, 25 to <30, 30 to <35, ≥35 kg/m<sup>2</sup>), history of diabetes (no, yes), history of hypertension/heart disease (no, yes), and lifetime occupational use of 2,4-dichlorophenoxyacetic acid (quartiles of total lifetime days or intensity-weighted lifetime days, missing as a separate category).

<sup>d</sup>Calculated by modeling quartile-specific median values of total lifetime days or intensity-weighted lifetime days of glyphosate use as a continuous variable.

**Table S8.** Associations between lifetime occupational glyphosate use and overall or expanded mLOY in models additionally adjusted for year of blood sample collection among male farmers in the BEEA study.

| Glyphosate use                   | <i>N</i> <sub>total</sub> | Overall mLOY <sup>a</sup> |                         |                                               | Expanded mLOY <sup>b</sup> |                         |                                               |
|----------------------------------|---------------------------|---------------------------|-------------------------|-----------------------------------------------|----------------------------|-------------------------|-----------------------------------------------|
|                                  |                           | <i>n</i> <sub>no</sub>    | <i>n</i> <sub>yes</sub> | OR (95% CI) <sup>c</sup>                      | <i>n</i> <sub>no</sub>     | <i>n</i> <sub>yes</sub> | OR (95% CI) <sup>c</sup>                      |
| Total lifetime days              |                           |                           |                         |                                               |                            |                         |                                               |
| Quartile 1 (0–26)                | 402                       | 300                       | 102                     | 1.00 (Ref)                                    | 351                        | 51                      | 1.00 (Ref)                                    |
| Quartile 2 (>26–76)              | 402                       | 306                       | 96                      | 1.25 (0.87, 1.80)                             | 363                        | 39                      | 1.05 (0.64, 1.73)                             |
| Quartile 3 (>76–161)             | 403                       | 327                       | 76                      | 1.27 (0.86, 1.87)                             | 371                        | 32                      | 1.27 (0.74, 2.16)                             |
| Quartile 4 (>161–3,063)          | 399                       | 330                       | 69                      | 1.31 (0.85, 2.01)                             | 363                        | 36                      | 1.79 (1.01, 3.17)                             |
|                                  |                           |                           |                         | <i>p</i> <sub>trend</sub> <sup>d</sup> = 0.35 |                            |                         | <i>p</i> <sub>trend</sub> <sup>d</sup> = 0.03 |
| Intensity-weighted lifetime days |                           |                           |                         |                                               |                            |                         |                                               |
| Quartile 1 (0–1,341)             | 401                       | 303                       | 98                      | 1.00 (Ref)                                    | 352                        | 49                      | 1.00 (Ref)                                    |
| Quartile 2 (>1,341–3,885)        | 400                       | 301                       | 99                      | 1.49 (1.03, 2.15)                             | 358                        | 42                      | 1.33 (0.81, 2.18)                             |
| Quartile 3 (>3,885–9,341)        | 401                       | 327                       | 74                      | 1.23 (0.83, 1.83)                             | 372                        | 29                      | 1.06 (0.61, 1.84)                             |
| Quartile 4 (>9,341–244,237)      | 400                       | 328                       | 72                      | 1.39 (0.90, 2.14)                             | 362                        | 38                      | 1.81 (1.02, 3.21)                             |
|                                  |                           |                           |                         | <i>p</i> <sub>trend</sub> <sup>d</sup> = 0.40 |                            |                         | <i>p</i> <sub>trend</sub> <sup>d</sup> = 0.07 |

Note: BEEA, Biomarkers of Exposure and Effect in Agriculture; BMI, body mass index; CI, confidence interval; mLOY, mosaic loss of chromosome Y; OR, odds ratio; Ref, reference.

<sup>a</sup>Any detectable mLOY (yes vs. no).

<sup>b</sup>mLOY affecting ≥10% of cells [yes vs. no (cellular fraction <10% or no mLOY)].

<sup>c</sup>Calculated using a logistic regression model adjusted for age (years; continuous), age<sup>2</sup>, state of residence (Iowa, North Carolina), source of DNA (whole blood, buffy coat), smoking status and pack-years (never, former/tertile 1, former/tertile 2, former/tertile 3, current/tertile 1, current/tertile 2, current/tertile 3, missing), alcohol consumption (0, 1–2, 3–6, ≥7 servings in the past 7 d), BMI (<25, 25 to <30, 30 to <35, ≥35 kg/m<sup>2</sup>), history of diabetes (no, yes), history of hypertension/heart disease (no, yes), lifetime occupational use of 2,4-dichlorophenoxyacetic acid (quartiles of total lifetime days or intensity-weighted lifetime days, missing as a separate category), and year of blood sample collection (2010 to 2017).

<sup>d</sup>Calculated by modeling quartile-specific median values of total lifetime days or intensity-weighted lifetime days of glyphosate use as a continuous variable.

**Table S9.** Associations between lifetime occupational glyphosate use and overall or expanded mLOY in models additionally adjusted for alcohol consumption at AHS enrollment among male farmers in the BEEA study.

| Glyphosate use                   | <i>N</i> <sub>total</sub> | Overall mLOY <sup>a</sup> |                         |                                               | Expanded mLOY <sup>b</sup> |                         |                                               |
|----------------------------------|---------------------------|---------------------------|-------------------------|-----------------------------------------------|----------------------------|-------------------------|-----------------------------------------------|
|                                  |                           | <i>n</i> <sub>no</sub>    | <i>n</i> <sub>yes</sub> | OR (95% CI) <sup>c</sup>                      | <i>n</i> <sub>no</sub>     | <i>n</i> <sub>yes</sub> | OR (95% CI) <sup>c</sup>                      |
| Total lifetime days              |                           |                           |                         |                                               |                            |                         |                                               |
| Quartile 1 (0–26)                | 402                       | 300                       | 102                     | 1.00 (Ref)                                    | 351                        | 51                      | 1.00 (Ref)                                    |
| Quartile 2 (>26–76)              | 402                       | 306                       | 96                      | 1.21 (0.84, 1.73)                             | 363                        | 39                      | 1.00 (0.61, 1.64)                             |
| Quartile 3 (>76–161)             | 403                       | 327                       | 76                      | 1.22 (0.83, 1.79)                             | 371                        | 32                      | 1.25 (0.74, 2.12)                             |
| Quartile 4 (>161–3,063)          | 399                       | 330                       | 69                      | 1.24 (0.81, 1.90)                             | 363                        | 36                      | 1.74 (0.99, 3.07)                             |
|                                  |                           |                           |                         | <i>p</i> <sub>trend</sub> <sup>d</sup> = 0.46 |                            |                         | <i>p</i> <sub>trend</sub> <sup>d</sup> = 0.03 |
| Intensity-weighted lifetime days |                           |                           |                         |                                               |                            |                         |                                               |
| Quartile 1 (0–1,341)             | 401                       | 303                       | 98                      | 1.00 (Ref)                                    | 352                        | 49                      | 1.00 (Ref)                                    |
| Quartile 2 (>1,341–3,885)        | 400                       | 301                       | 99                      | 1.45 (1.00, 2.09)                             | 358                        | 42                      | 1.29 (0.79, 2.12)                             |
| Quartile 3 (>3,885–9,341)        | 401                       | 327                       | 74                      | 1.18 (0.79, 1.75)                             | 372                        | 29                      | 1.04 (0.60, 1.81)                             |
| Quartile 4 (>9,341–244,237)      | 400                       | 328                       | 72                      | 1.28 (0.84, 1.96)                             | 362                        | 38                      | 1.75 (0.99, 3.07)                             |
|                                  |                           |                           |                         | <i>p</i> <sub>trend</sub> <sup>d</sup> = 0.62 |                            |                         | <i>p</i> <sub>trend</sub> <sup>d</sup> = 0.07 |

Note: AHS, Agricultural Health Study; BEEA, Biomarkers of Exposure and Effect in Agriculture; BMI, body mass index; CI, confidence interval; mLOY, mosaic loss of chromosome Y; OR, odds ratio; Ref, reference.

<sup>a</sup>Any detectable mLOY (yes vs. no).

<sup>b</sup>mLOY affecting ≥10% of cells [yes vs. no (cellular fraction <10% or no mLOY)].

<sup>c</sup>Calculated using a logistic regression model adjusted for age (years; continuous), age<sup>2</sup>, state of residence (Iowa, North Carolina), source of DNA (whole blood, buffy coat), smoking status and pack-years (never, former/tertile 1, former/tertile 2, former/tertile 3, current/tertile 1, current/tertile 2, current/tertile 3, missing), recent alcohol consumption (0, 1–2, 3–6, ≥7 servings in the past 7 d), past-year alcohol consumption at AHS enrollment in 1993–1997 (0, <3, 3 to <7, ≥7 drinks/wk, missing), BMI (<25, 25 to <30, 30 to <35, ≥35 kg/m<sup>2</sup>), history of diabetes (no, yes), history of hypertension/heart disease (no, yes), and lifetime occupational use of 2,4-dichlorophenoxyacetic acid (quartiles of total lifetime days or intensity-weighted lifetime days, missing as a separate category).

<sup>d</sup>Calculated by modeling quartile-specific median values of total lifetime days or intensity-weighted lifetime days of glyphosate use as a continuous variable.
